# Supplementary material for: CRISPR/Cas9-mediated viral interference in plants
Source: PubMed Central journal article supplement (PMC4641396; doi:10.1186/s13059-015-0799-6), 2015-11-11
Supplement: 13059_2015_799_MOESM1_ESM.pdf [file 13059_2015_799_MOESM1_ESM.pdf]

**SUPPLEMENTARY INFORMATION: ADDITIONAL FILE 1**

**CRISPR/Cas9-mediated viral interference in plants**

Zahir Ali<sup>1</sup>, Aala Abulfaraj<sup>1</sup>, Ali Idris<sup>1</sup>, Shakila Ali<sup>1</sup>, Manal Tashkandi<sup>1</sup>, and Magdy M. Mahfouz<sup>1,2</sup>

<sup>1</sup>Laboratory for Genome Engineering, Center for Desert Agriculture & Division of Biological Sciences, 4700 King Abdullah University of Science and Technology, Thuwal 23955-6900, Saudi Arabia

**Supplementary Tables**

**Supplementary Table 1. Primers used in this study.**

**Supplementary Table 2. Summary of different sgRNA used for targeting of TYLCV genome.**

**Supplementary Table 1.** Primers used in this study.

| primers name        | sequence (5' ---- 3')                                          | Usage                                                                                               |
|---------------------|----------------------------------------------------------------|-----------------------------------------------------------------------------------------------------|
| TYLCV2.3-IR-T-F     | AATTGGGAAAGTGCTTCCTCT                                          | Semi-q PCR, to amplify TYLCV IR flanking region, to make probe for southern, detection TYLCV by PCR |
| TYLCV2.3-IR-T-R     | ATAGTCACGGGCCCTTACAACA                                         |                                                                                                     |
| TYLCV-IR-T1         | CGAGTCTAGAGGCCATCCGTATA<br>ATATTACGTTTTAGAGCTAGAAA<br>TAGCAAG  | To clone TYLCV IR-gRNA                                                                              |
| SPDK-gRNA-R         | acatGCCCGGgAAAAAAGCACCG<br>ACTCGG                              | To clone all gRNA                                                                                   |
| NB-ACTIN1-RT-F      | TGAAGATCCTCACAGAGCGTGG                                         | RT-PCR normalization control                                                                        |
| NB-ACTIN1QRT-LIU-R  | TTGTATGTGGTCTCGTGGATTC                                         |                                                                                                     |
| TYLCV-CP-T1         | CGAGTCTAGAGCTTCGGCGAACC<br>TTCGAGACGTTTTAGAGCTAGAA<br>ATAGCAAG | To clone TYLCV CP-gRNA                                                                              |
| TYLCV-RCR11-T       | CGAGTCTAGAGTGGATGAGCACA<br>TGCAAGTGGTTTTAGAGCTAGAA<br>ATAGCAAG | To clone TYLCV RCR11-gRNA                                                                           |
| TRV1-RELICASE-RT-F  | CTACTGGGAGAGCAGCAACC                                           | For detection of TRV-RNA1 systemic movement                                                         |
| TRV1-REPLICASE-RT-R | CTGAGCGCAAAGTACACCA                                            |                                                                                                     |
| TRV2-CP-RT-F        | TTGGGTGGAATCAGTTTCGT                                           | For detection of TRV-RNA2 systemic movement                                                         |
| TRV2-CP-RT-R        | TCTTCCAAAGTCGAGCCAGT                                           |                                                                                                     |
| WOR-IR-T-F          | GGCTTTAATTTGAAATGATGGTG                                        | For PCR flanking Worland IR target                                                                  |
| WOR-IR-T-R          | AAAAATTCGTACCTGATTGCAG                                         |                                                                                                     |
| WOR-IR-T1           | CGAGTCTAGAGCCATCCGCAATAATATTACG<br>TTTTAGAGCTAGAAATAGCAAG      | To clone Worland IR-gRNA                                                                            |
| WOR-L1-T1/2-F       | TGCTTCAGCTGCATTACCTG                                           | For PCR flanking Worland RCR11 target                                                               |
| WOR-L1-T1/2-R       | ATGGCCCTGGAGGTATATAAG                                          |                                                                                                     |
| WOR-L1-RCR11-T      | GAGTCTAGAGCTTTGAATTGGATGAGGGCG<br>GTTTTAGAGCTAGAAATAGCAAG      | To clone Worland RCR11-gRNA                                                                         |
| TYLCV 2.3-CP-T1/2-F | TTCTTCACGGTTGCGGTA                                             | For PCR flanking TYLCV CP target                                                                    |
| TYLCV2.3-CP-T1/2-R  | GAGCTTTGGACCCTGAATTG                                           |                                                                                                     |
| TYLCV2.3-REP-T1/2-F | GAGCTTTGGACCCTGAATTG                                           | For PCR flanking TYLCV RCR11 target                                                                 |
| TYLCV2.3-REP-T1/2-R | TTGGAGCGTGATGATTTTGA                                           |                                                                                                     |
| MeMV-IR-T-F         | TGTGCAGAGCTTTGATTTGG                                           | For PCR flanking MeMV IR target                                                                     |
| MeMV-IR-T-R         | AAATTGGCGTTGCGACTAAC                                           |                                                                                                     |

| Treatment / sgRNA                                                 | Mock experiment | Vector Control experiment | IR-sgRNA / TYLCV                                       | CP-sgRNA / TYLCV | RCRII-sgRNA / TYLCV | IR + CP-sgRNA / TYLCV   | IR-CP-sgRNA / TYLCV (PTG) |
|-------------------------------------------------------------------|-----------------|---------------------------|--------------------------------------------------------|------------------|---------------------|-------------------------|---------------------------|
| <b>No. of plants / experiment</b>                                 | 8               | 8                         | 12                                                     | 8                | 8                   | 8                       | 10                        |
| <b>No. of experimental Repeats</b>                                | 3               | 3                         | 5                                                      | 3                | 3                   | 3                       | 4                         |
| <b>Total number of plants</b>                                     | 40              | 40                        | 60                                                     | 24               | 24                  | 24                      | 40                        |
| <b>No. of Plants with no TYLCV symptoms on leaves</b>             | (100 %)         | (None)                    | (85 %)                                                 | (None)           | (11.6 %)            | (88.6 %)                | (95 %)                    |
| <b>No. of Plants with no TYLCV symptoms on leaves but stunted</b> | (None)          | (None)                    | (35.8 %)                                               | (None)           | (None)              | (27.7 %)                | (7 %)                     |
| <b>No. of Plants with Mild TYLCV symptoms</b>                     | (None)          | (None)                    | (15.2 %)                                               | (73.3 %)         | (88.7 %)            | (11.3 %)                | 3 %                       |
| <b>No. of Plants with severe TYLCV symptoms</b>                   | (None)          | (100 %)                   | (None)                                                 | (27.7 %)         | (12.3 %)            | (None)                  | (None)                    |
| <b>TYLCV detection by PCR</b>                                     | (None)          | (100 %)                   | (39 %)                                                 | (94 %)           | (91 %)              | (25 %)                  | (11 %)                    |
| <b>TYLCV detection by DNA blotting</b>                            | (None)          | (100 %)                   | (19 %)                                                 | (68 %)           | (53 %)              | (11 %)                  | (3 %)                     |
| <b>No. of clones sequenced</b>                                    | (None)          | 30                        | 300                                                    | 88               | 142                 | 98(IR) / 58 (CP)        | 112(IR) / 66(CP)          |
| <b>No. of clones with Indels</b>                                  | (None)          | (None)                    | (36 - 42 %)                                            | (22 – 28 %)      | (31 -39 %)          | 28 % (IR) and 19 % (CP) | 38 % IR and 31 % CP       |
| <b>Can target</b>                                                 | N.A             | N.A                       | IR sequence of TYLCV (38%)<br>BCTV (22%)<br>MeMV (31%) | Specific         | Specific            | N.A                     | N.A                       |

Supplementary Table 2. Summary of different sgRNA used for targeting of TYLCV genome. All the observations were performed with NB-Cas9OE plants. Data were collected at 28 dpi. Three biologically independent experiments were performed with at least 8 replicate plants for each type of sgRNA. Mock, NB-Cas9OE plants treated with infiltration buffer; Vector Control, TRV2 with a non-viral target sequence; N.A not applicable.
