# Supplementary material for: CRISPR/Cas9-mediated viral interference in plants
Source: PubMed Central journal article supplement (PMC4641396; doi:10.1186/s13059-015-0799-6), 2015-11-11
Supplement: 13059_2015_799_MOESM4_ESM.pdf [file 13059_2015_799_MOESM4_ESM.pdf]

## **SUPPLEMENTARY INFORMATION: ADDITIONAL FILE 4**

### **CRISPR/Cas9-mediated viral interference in plants**

Zahir Ali<sup>1</sup>, Aala Abulfaraj<sup>1</sup>, Ali Idris<sup>1</sup>, Shakila Ali<sup>1</sup>, Manal Tashkandi<sup>1</sup>, and Magdy M. Mahfouz<sup>1,2</sup>

<sup>1</sup>Laboratory for Genome Engineering, Center for Desert Agriculture & Division of Biological Sciences, 4700 King Abdullah University of Science and Technology, Thuwal 23955-6900, Saudi Arabia

### **Supplementary sequences and Maps**

Supplementary Sequence 1. TYLCV 2.3 genome

**GGCCATCCGTATAAATATTAC**CGGATGGCCGCGAATTTTGTGTGGGCCCTCAACGCACTAA  
CTGACAAGGACATGCGAACCAATCAAATTGCATCCTCAAACGTTAGATAAGTGTTTCATTTGT  
cTTTATATACTTGGTCCCCAAGTATTTTGTCTTGCAATATGTGGGACCCACTTCTAAATGAATT  
TCCTGAATCTGTTACGGATTTTCGTTGTATGTTAGCTATTAATATTTGTCAGGCTGTTGAGGA  
AACTTACGAGCCCAATACATTGGGCCACGATTTAATTAGGGATCTTATATCTGTTGTAAGGG  
CCCGTGACTATGTCGAAGCGACCAGGCGATATAATCATTCCACGCC**GTCTCGAAGGTTCC**  
**CCGAAG**GCTGAACTTCGACAGCCCATAACAGCAGCCGTGCTGCTGTCCCCATTGTCCAAGGCA  
CAAACAAGCGACGATCATGGACGTACAGGCCCATGTACCGAAAGCCCAGAATATACAGAAT  
GTATCGAAGCCCTGATGTTCCCGTGGATGTGAAGGCCCATGTAAAGTCCAGTCTTATGAGC  
AACGGGATGATATTAAGCATACTGGTATTGTTTCGTTGTGTTAGTGATGTTACTCGTGGATCTG  
GAATTACTCACAGAGTGGGTAAGAGGTTCTGTGTTAAATCGATATATTTTTTAGGTAAGTC  
TGGATGGATGAAAATATCAAGAAGCAGAATCACACTAATCAGGTCATGTTCTTCTTGGTCCG  
TGATAGAAGGCCTTATGGAAGCAGCCCAATGGATTTTGGACAGGTTTTTAATATGTTTCGATA  
ATGAGCCCAGTACCGCAACCGTGAAGAATGATTTGCGGGATAGGTTTCAAGTGATAAGGAA  
ATTTTCATGCTACAGTTATTGGTGGGCCCTCTGGAATGAAGGAACAGGCATTAGTTAAGAGAT  
TTTTTAGAATTAACAGTCATGTAACTTATAATCATCAGGAGGCAGCCAAGTATGAGAACCAT  
ACTGAGAACGCCTTGTTATTGTATATGGCATGTACGCATGCCTCTAATCCAGTGTATGCAACT  
ATGAAAATACGCATCTATTTCTATGATTCAATATCAAATTAATAAATTTTATATTTTATATCA  
TGACTTTCTGTTACATTTATTGTGTTTTCAAGTACATCATAACAATACATGATCAACTGCTCTG  
ATTACATTGTTAATGGAAATTACACCAAGACTATCTAAATACTTAAGAACTTGATATCTAAA  
TACTCTTAAGAAACGACCAGTCTGAGGCCGTAAGGTCGTCCAGATTTGGAAGTTGAGATAAC  
ATTTGTGAATCCCCAGTACCTTCCTGATATTGTGATTGAATCTTATCTGTATTGAAATGATGT  
CGTGGCTCATTAGAAATGGCCTCTCGTCGTGGTTGGTGATCTTGAAATATAGGGGATTTTCTA  
TCTCCCATATAAAAACGCCATTCTGGGCTTGATGAGCAGTGATGAGTTCGCCGGTGCCTGAA  
TCCATGATTGATGCAGTTGATGTGGAGGTAATATGAGCATCCGCAGTCGAGGTCTATGCGCT  
TACGTCTGACTGGCTTAGTCTTCGCTATGCGGTGTTGGATTTTGATTGGCACTTGAGAACAGT  
GGCTCGTAGAGGGTGACGAAGGTTGCATTCTTGAGAGCCCAATTTTTCAAGGATATGTTTTT  
TTCTTCGTCTAGATATTCCCTATATGATGAGGTAGGTCCTGGATTGCAGAGGAAGATAGTGG  
GAATTCCCCCTTTAATTTGAATCGGCTTCCCGTACTTTGTGTTGCTTTGCCAGTCCCTCTGGGC  
CCCCATGAATTCCTTGAAGTGCTTTAAATAATGCGGGTctacgtcatc gatgacgttgaccacgcatcattactgtac  
acctttgacttaggtctagatgtccacataaataattatgtggcctagagacctggcccacattgtctccccgttctgctatcacctc gatgacaatacta  
ttaggtctCCATGGCCGCGCAGCGGAAGACATGACGTTCTCGGACACCCATACTTCAAGTTCATCT  
GGAAC TTGATTA AAAAGATGAAGATAAAAAGGGAGAAATATAAGGAGCCGGAGGCTCCTGA  
AAAATTCTATCTAAATTTGAATTTAAATTATGAAATTGAAGTATAAAGTCTCTAGGAGCTTTT  
TCCTTCAGTATATTGAGGGCCTGAGCTTTGGACCCTGAATTGATTGCCTCGGCATATGCGTCG  
TTGGCAGATTGGCAACCTCCTCTAGCTGATCGTCCATCGACTTGAAAACCTCCATGATCAAT  
GACGTCTCCGCTTTTTTCCATATAGGATTTGACATCGCTTGAAC TTTAGCTCCCTGAATGTT  
CGGATGGAAATGTGCTGACCTGGTTGGGGATGTGAGGTCGAAGAATCTGTTGTTTTTGC ACT  
GGAAC TTTCC TCGAAC**TGGATGAGCACATGCAAGTG**AGGAGTCCCATCTTCATGAAGCTCT  
CTGCAGATTCTAATGAATTTTTTGGAAAGTGGGTGTTTGTATATTTAATAATTGGGAAAGTGCT  
TCCTCTTTAGTTAGAGAGCATTGGGATAAGTGAGAAAATAATTTTTGGCATTATTTTAAAC

CGATTGGGGGCTGCCATATTGACTTGGTCAATCGGAGTCTCTCAACTCTTTCTATGTATTGGT  
GTATTGGAGTCCTATATATATGGAGACTCCAATGGCATATATGTAAATATTGTACTTTAATTC  
AAAATCATCACGCTCCAAAAAGC

IR, CP and RCR-II target sequences are shown in red with yellow highlight.

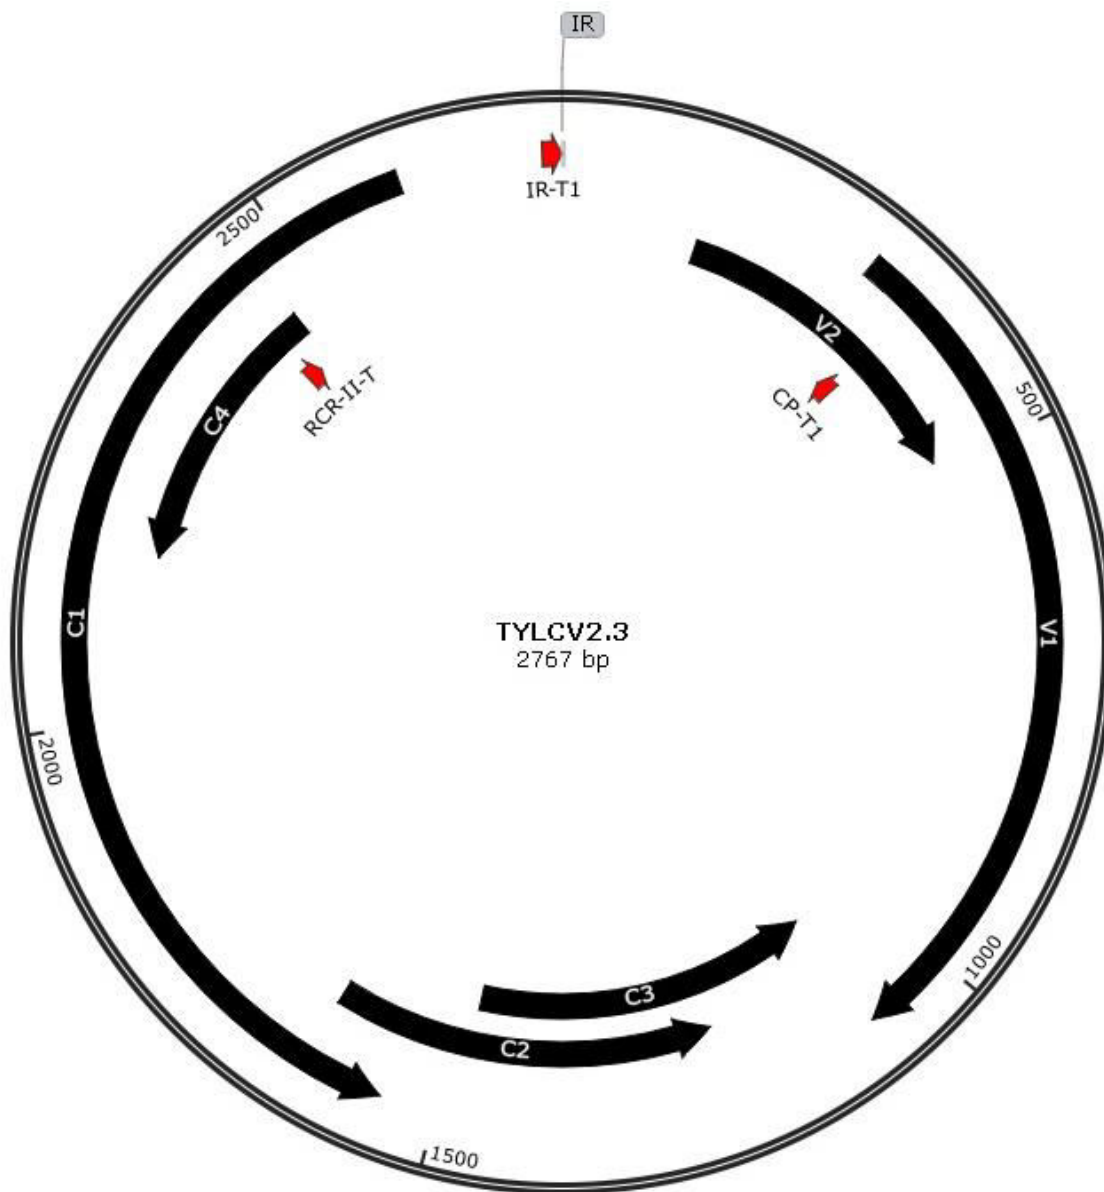

IR, CP and RCR-II Targets are shown as red arrow heads.

### Supplementary Sequence 2. IR-gRNA (TYLCV) sequence and map

Cgagtctaga**GGCCATCCGTATAATATTAC**gttttagagctagaatagcaagttaaaataaggctagtcggtatcaact  
gaaaaagtggcaccgagtcggtgcttttt

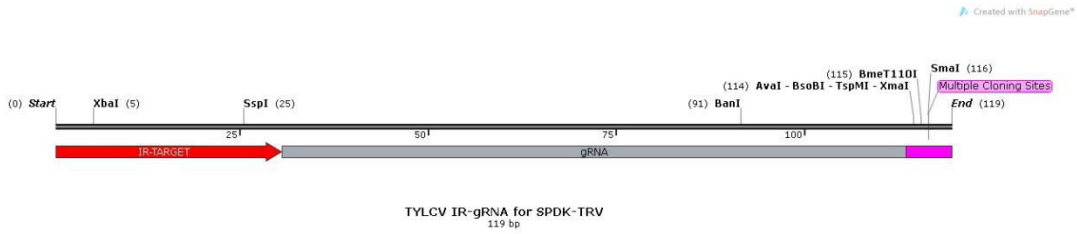

Target sequence is shown in red.

### Supplementary Sequence 3. CP-gRNA (TYLCV) sequence and map

Cgagtctaga**GCTTCGGCGAACCTTCGAGAC**gttttagagctagaatagcaagttaaaataaggctagtcggtatcaac  
ttgaaaaagtggcaccgagtcggtgcttttttccggg

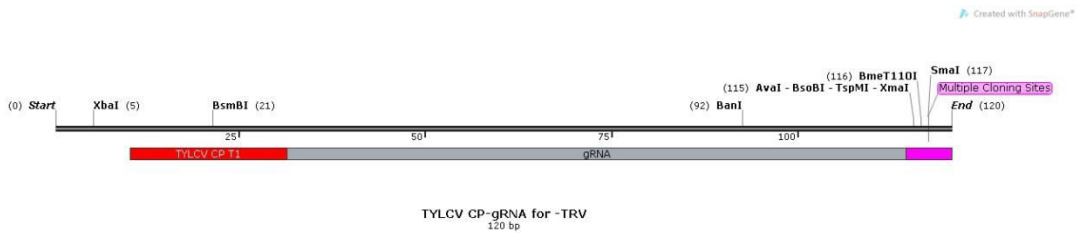

Target sequence is shown in red.

### Supplementary Sequence 4. RCRII-gRNA (TYLCV) sequence and map

cgagtctaga**GTGGATGAGCACATGCAAGTG**GTTTTAGAGCTAGAAATAGCAAGTTAAAATAAGG  
CTAGTCCGTTATCAACTTGAAAAAGTGGCACCGAGTCGGTGCCTTTTTTCCCGGG

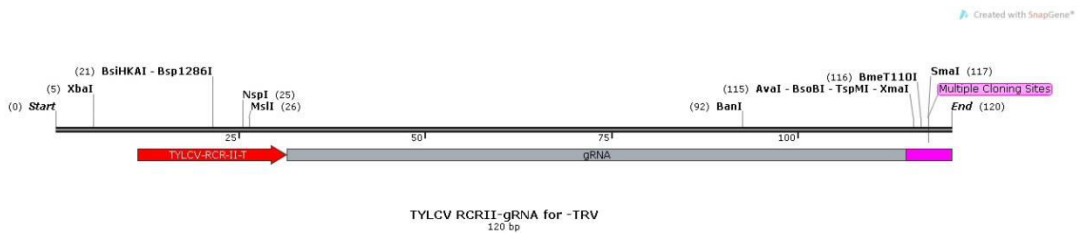

Target sequence is shown in red.

**Supplementary Sequence 5.** IR-gRNA (BCTV Worland) sequence and map

cgagtctaga**GGCCATCCGCAATAATATTAC**GTTTTAGAGCTAGAAATAGCAAGTTAAAATAAGG  
CTAGTCCGTTATCAACTTGAAAAAGTGGCACCCAGTTCGGTGCCTTTTTTTCCCGGG

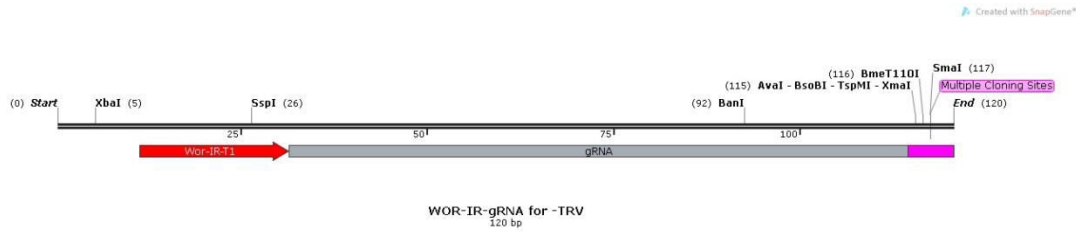

Target sequence is shown in red.

**Supplementary Sequence 6.** RCRII-gRNA (BCTV Worland) sequence and map

Cgagtctaga**GCTTTGAATTGGATGAGGGCG**GTTTTAGAGCTAGAAATAGCAAGTTAAAATAAGG  
CTAGTCCGTTATCAACTTGAAAAAGTGGCACCCAGTTCGGTGCCTTTTTTTCCCGGG

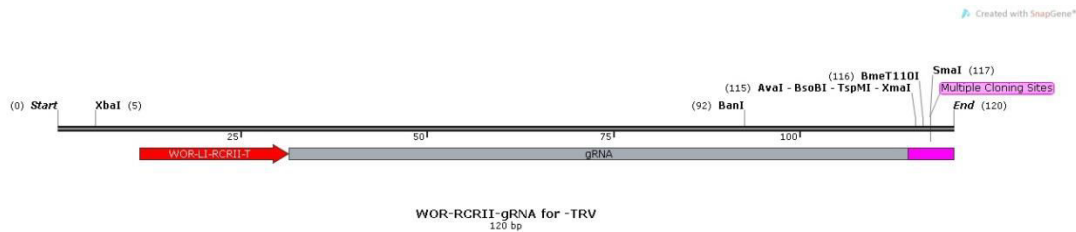

Target sequence is shown in red.

**Supplementary Sequence 7.** BCTV (Worland) genomic sequence and map.

**GGCCATCCGCAATAATATTAC**CGGATGGCCCCGAAAATTTTGCCCCCAATTGTAACGTGAC  
ACGTGTTATCGCATTATACGTTGTCGGTGCCTTGAAACTTCCTATGTAAGTTTCCTTCTCTAA  
CAAGTTTTGACTAGTCAAAAGTTGCGGCCGACAACCTTTACTTTTTAAAGTAAAGTAA  
GTTTATTATCAAACTTGCTGTGTAAGTTGGAATATTTTTCTATTTAAATAGCTATACGAA  
TACGTATAGGTATTTATAAATGATGGTCTGTTACCAGACTGGTATTTTTGCTATTTATCTTC  
AGTATTCTACTGCAATCAGGTACGAATTTTTATGGGACCTTTCAGAGTGGATCAATTTCCAG  
ACAATTATCCAGCCTTTCTAGCAGTATCGACCAGTTGTTTCTTAAGGTACAACAGGTGGTGT  
ATACTAGGTATCCATCAAGAGATAGAGGCTCTGACCCTAGAAGAAGGCGAGGTCTTCTTCA  
ATCCAGAAGGAAGTGAAGAAGCTACTGAGGTGTAAGGTCAATTTTCATAGGAAGTGTTCTG  
TGTATGAGGAAATATACAAGAAATACGTATAACAATGTCCAGAAAAGAAAGGTGAATCCTC  
AAAGTGCTTGGCCGAAGAAGAGGAGGACTACTACGACTTCGAGGAAATACCAATGGAGGAG  
ACCTGTGACAAAAACAGGACTCCGAAGTTAAAGATGTATGATGATATGCTTGGTGCCTGGT  
GTATAGGATCTACCATTAGTAATAATGGTATGATTACTATGCTGAATAATTATGTCCAGGGT  
ATTGGTGATAGTCAGAGAGCGAACAACGTTACTGTGACGAAGCATTGGAAGTTTGATATGGC

TCTTATGGGGAGTTCTCCGTTCTGGGAGACTCCTAATTATATGACCCAATATCATTGGATTAT  
CATAGACAAGGATGTTGGGTCAGTGTCCCTACTAAGTTATCCAGTATATTTGATATCCGG  
ATAACGGTCAGGCTATGCCGTCTACTTATCGTATTCGAAGAGATATGAACGAGAGGTTTCATT  
GTGAAGAAGAAGTGGAGAACTCATTTGATGTCTACTGGTACTGGCTATGGAGGCAAGGAGA  
CTTACAAGGCTCCTTCAATGCCAAATTACAAGAAACCGATGAATATCAATGTCCGTAATCTG  
AACATGAGGACTATTTGGAAAGATACCGGAGGTGGGAAGTATGAAGACGTGAAGGAGAAT  
GCTTTACTCTATGTTGTTGTTAATGATAATACTGATAATACTAATATGTATGCCACTTTGTTT  
GGCAATTGTAGATGTTATTTCTATTAATAAACTATTTTTTATTTAATACAACTTCATTGCAA  
TACTAGTATATTGTATTACACTATTGACGAAATTGAAGACAGAATACAATACATGATTTAAT  
ATTTCTATTACAATGTTAATTGAGAGAGAAGATCGTTTTTTGATTTCCCTGTCGACTTGGTTC  
TTCAAGACTCTCAAAAAACGGTCTCCAGTCAATGTCCTGTGGGATCCAGTTATCGTCATATC  
GATCCAACACTTGTGCAGGTTGAGCGATTTGCGGAGGTTGTGGTTGAATCTCATCTGGACTT  
TGAGTTGATAAATCGTTCGGTATCTCTCGAACCATAGGAGTTTGAAGTAGAGTGGATTCCGA  
ACCGATGTTGTTGGTGTGATTTCGTCCGCTGTTCCAGGGTAATAGGTAGTTCGGTGCGAAA  
ATCCGTGATGGCAGTCATGATGAATTGTGAAGTGACACTTACAGGGGAGATTGACCTTGCGA  
GGACGCTTCTGTATCTTTATCAAAGAGAGGGCCGGAGAGTTTAAACGAAGGTTGAATTCTGTA  
TAGTCCAGGACTTAAGGGCTTCATTTTCTGATTTATCTAGGAAGTCCTGGTAAGAGCTGCCAT  
CTCCTGGGTTGCATAATAATACTGGGAATACCACCTTTAATGACACGTGGTTTTCCATACT  
TTAAGTTTGTCTGCCACTCTCTTTGTGCGCCTATGAGGTGTTTCCAATGCTTCATCTTTAAGTA  
AGCTGGGTCTACGTCATCAATGACGTTATATAAAACATCATCGTGATATGTTTTTAACTAA  
AATCTAAATGCCCTGAAATGTAATTATGAGGTCTAATGATCTAGCCCACAAAGTCTTACCC  
GTTCTAGAATCACCTCTATGATTATACTATTATATCTAAAAGGCCGCGCAGCGGCATCCAC  
CCCGAAATAAGAATCTGCCCACTCTTGAACAATTTCTGGAACCTTGAGTGAAAGAAGATTGTG  
GGAATGGAGGTTGATAAATATCTGGTGGAGGAAGAAAAATGGCTTCTAAGTTAGGTTTAAAG  
GTTGTGATACTGAAAAATATATTTTTCTGGGAGTTTCTCCCTTATTATTTGCAGTGCTTCAGC  
TGCATTACCTGCATTTAATGCTTCTGCTGCTGCATCATTAGCCGTCTGCTGGCCTCCTCTAGC  
AGATCTTCCGTCGACTTGAAATGTACCCAGTCGACGTAATCACCGTCCTTCTCGATGTATTG  
TTAACATCGGATGCAGATTTTGCTCCTTGGAAGTTGGGGTGGAAAGGTGGAGCTTGAGGAAG  
GATGAGTGATGTCGAAGTGTCTAGGGTTTCTGAATTGTGCTTTAC**CTTTGAATTGGATGAGG**  
**GCG**TGGAGATGCAGAGACCCATCCTGATGTTTTTCTGGGATACTCTAATAAATAATTTATC  
AGATGGGCAAGGAATATTTTTCAATATTTCTAGAGCATCTTCTTTTATAACTGAACATCGTGG  
GTATGTTAGAAAGATATTTTTGGCTTTAATTTGAAATGATGGTGAACGAGGCATGGTTACTA  
TTCCTATTGGGGGCTCTCGTAAACTTGTATGAATGGGGTGCTATGGGAGCCCTTATATACCTC  
CAGGG

IR and RCR-II target sequences are shown in red with yellow highlight.

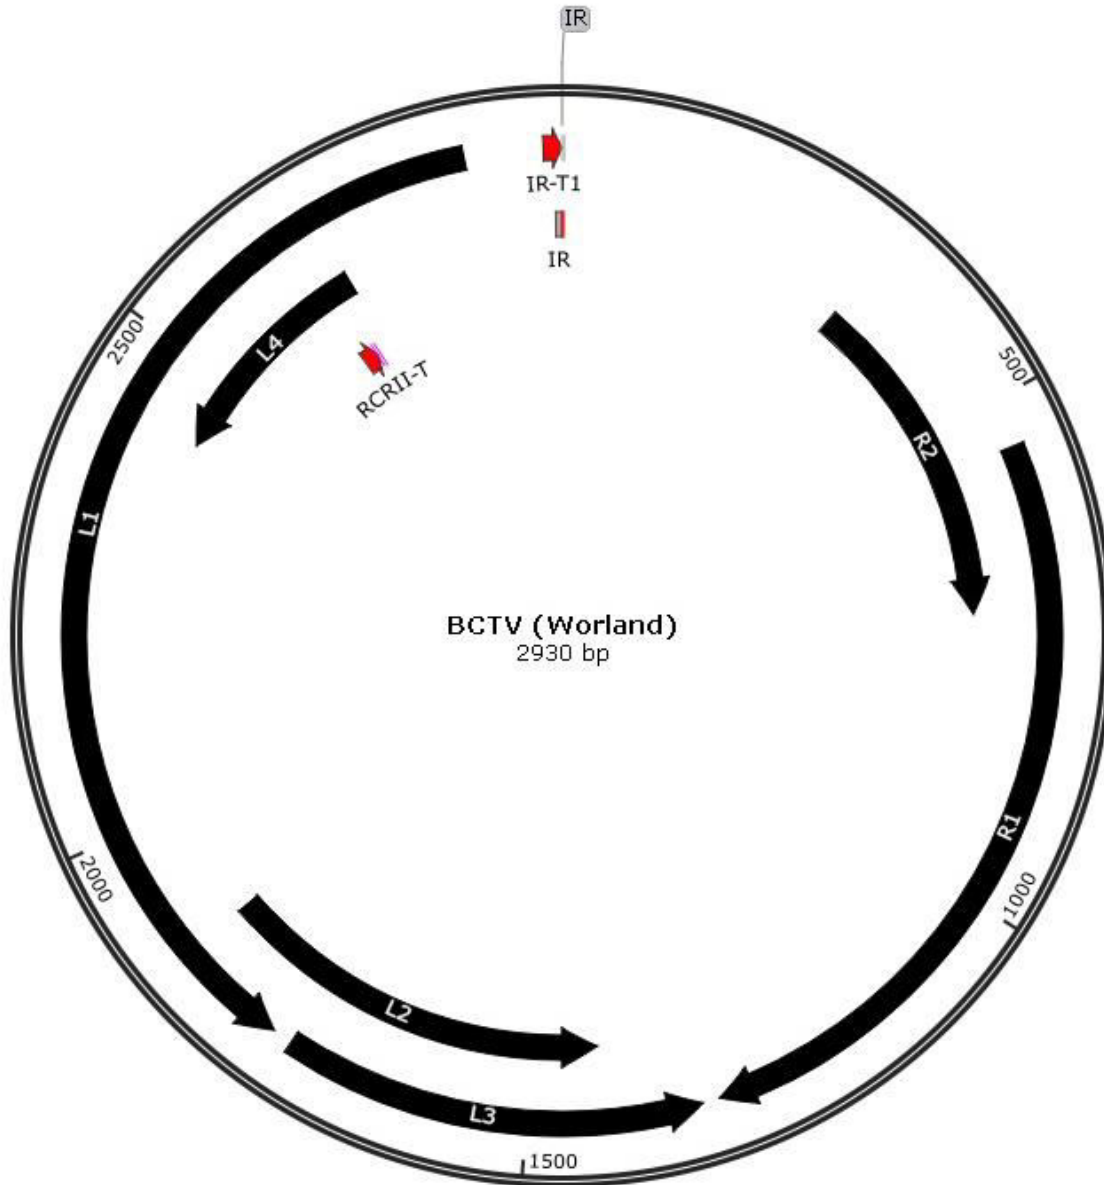

IR and RCR-II Targets are shown as red arrow heads.

**Supplementary Sequence 8.** MeMV sequence and map

GGCCATCCGCTATAATATTACCGGATGGCCGCCCGCCGCGCCCCCCTGGGCCACATATTA  
AAGCCGTCCAATCACAAAGCGTCCTGGAAGTCTAATTGTTTAAAATAAGCCTATAAATACAT  
TGGAGTCCGTCTATACCCACCAACTTTAATTTAAAATGGTTAAGAGGGACGCCCCATGGCG  
TTAATGGCGGGGACCACTAAAGTTAGTCGCAACGCCAATTTCTCGCCACGTGGAGGTATGG  
GCCCTAAGGCCGCTGCTTGGGTTAACAGGCCCATGTACAGGAAGCCCAGAATTTATCGCACT  
TTGAGAGGGCCTGATGTTCTAAAGGTTGTGAAGGCCCATGTAAGGTACAGTCTTTCGAGCA  
GCGTCATGATATTTCTCATGTTGGTAAGGTAATCTGTATATCCGATGTAACCTCGTGGTAACGG  
TATTACTACCGTGTTGGCAAGCGTTTTTGTGTGAAGTCTGTGTATATTCTAGGTAATAATG

GATGGATGAGAACATAAAGCTGAAGAACCACACGAACAGCGTCATGTTTTGGTTGATTTCGT  
GACAGGAGACCCTATGGTACCCCTATGGATTTTGGTCAGGTGTTTAAACATGTATGACAATGA  
GCCGAGTACTGCTACCGTCAAGAACGATCTTCGCGATCGATTTCAAGTCATGCATAGGTTCT  
ATGCCAAAGTAACTGGTGGTCAGTATGCCAGTAAACGAGCAGGCATTGGTTCCGGCGATTTTGG  
AAGGTTAACAACACTACGTCGTGTATAACCATCAGGAAGCAGGAAAATACGAGAATCACACGG  
AGAATGCTCTGTTATTGTATATGGCATGTACTCATGCTTCTAATCCTGTGTATGCTACCTTGA  
AAATTCGTAGTTATTTTTATGACTCCATTTTGAATTAATAAAGATTAATTTTTATTGAATGTC  
TTTCGAGCACACAATTTACATATGGTTTATCCGTTGCGAAACGAACAGCTCTAATGACATTG  
TTAAGCGAAACAACACCTAATTGATCTAAATACATTA AAACTAAATCTTTAAATCTATTTAA  
ATATGTCGTCCCAGAAGCTTGAAGTGTGTCGTCCAGATTTGGAAGTTCAGGTATGCTTTGT  
GTAGACTCAACGCCTTCCCTCAGGTTGTAGTTGAACCGTATTTGGATGGTGTATATTCTGGTTG  
TGGTGTATATTGGCTCCTCCACTTGGATTATCTTGAAATAGAGGGGATTTGGAACCTCCCAG  
ATAAAAACGCCATTCATTGCTTGATGAGCAGTGATGGGTTCCCTGTGCGTGAATCCATGGT  
TTCTGCAGTTGATGTGTACGTAAATTGAACAGCCACAGTCCAGGTCTAACCTTCTCCGTCTAA  
TGACAGATTTGGATCTCTTCGCTCTCCTGTGCTGTGCTTTGATAGAGGGGGGAGTTGAGGAA  
GATGAATTTTGCATTGTGGATCGTCCACGCTCTGAGAGATGCGTTTTTCATCTTTATCGAGGAA  
GTCTTTATAGCTAGCCCCCTCTCCTGGATTGCACAGCACGATTGAGGGTATTCCTCCTTTAAT  
TTGAACTGGCTTCCCGTATTTACAGTTGGACTGCCAGTCCTTTTGGGCCCTATCAATTCCTT  
CCAATGCTTTAATTTCAAATAATTAGGGCTTATGTCATCAATGACGTTATATTTCGACGTCATT  
CGAATAGACTCTGCCATTAAGTCAAGATGTCCACTAAGATAATTATGTTTACCTAATGAAC  
GGGCCACATTGTTTTTCCAGTTGACTATCTCCTTCGATGATGATACTTATCGGTCTATCTG  
CCCGCGCAGCGGCACCCCTCCCAAAGTAGTTGTCTGCCATTCTTGCATCTCATCTGGAACGT  
TCGTGAAGGAGGAGAGTTGAAACGGAGGAACCCATGGTTCTGGAGACTTCTGAAATATTCTT  
GTTGCGTTCGCAACGAGATTGTGATGTTGAAGAAAGAAGTGTGTGGTTGTTCCCTCCTTTATT  
ATTTGCAGTGCTTCCCTCTGCAGAAGCTGCGTTTAAACGCCTTTGCGTATGTATCGTTAGAAGAC  
TGCTGACCTCCTCTAGCAGATCTTCCGTCGATCTGGAATTGTCCCCATTCAATTGTATCTCCG  
TCCTTGTCGATGTAGGACTTGACATCGGAGCTGGATTTAGCTCCCTGAATGTTTCGGATGGAA  
ATGTGCTGACCTGGTTGGGGATACCAAATCGAAGAATCTGTTATTCGTGCAGTTGTATTTTCC  
TTCGAACTGGATAAGCACATGGAGATGAGGTTCCCATTTATCGTGAAGCTCTCTACAGATCT  
TGATGAATTTTTTGTTTACAGGGGTGTGCAGAGCTTTGATTTGGGACAGTGCTTCTTCTTTGG  
CTAATGAACATATAGGGTATGTGAGGAAATAGTTTTTGGCTTTTATTGAGAATGAACCCTTC  
CGTGGCATTTTTGTAAATAAGGGATGTTCCCCCAATTGCTCCGCTCTCAAACTCTATATGAAT  
CGGGGGAACCTGGGGGTACATTTATACTAGA ACTCTCATTAAAGGGATTTGCAACACGTGGC



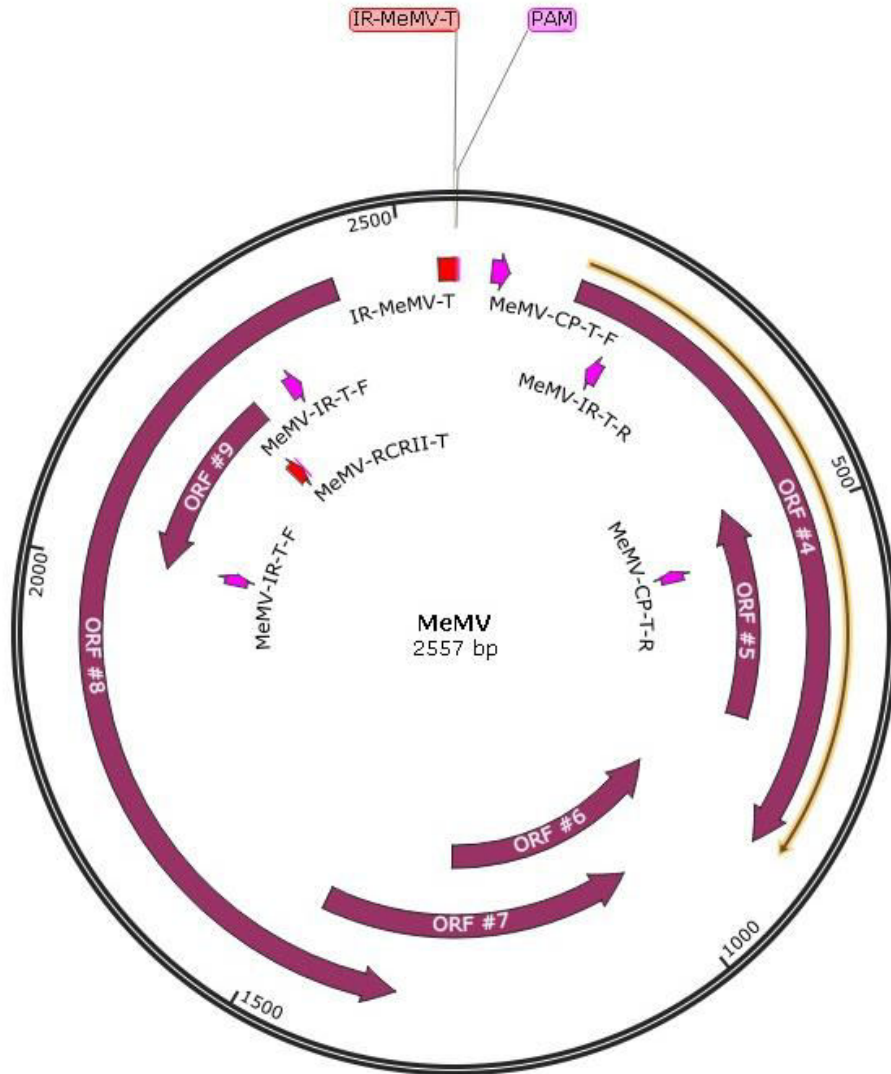

IR Targets is shown in red.

**Supplementary Sequence 9.** Non-specific sgRNA sequence.

cgagtctaga**GTGGATTCTCTCTGCAAGCCA**GTTTTAGAGCTAGAAATAGCAAGTTAAAATAAG  
GCTAGTCCGTTATCAACTTGAAAAAGTGGCACCGAGTCGGTGCTTTTTTTCCCGGG
